# Supplementary material
Source: PubMed Central journal article supplement (PMC6773234)
Supplement: kccy-18-20-1654796-s001.pdf [file kccy-18-20-1654796-s001.pdf]

## Supplementary Material

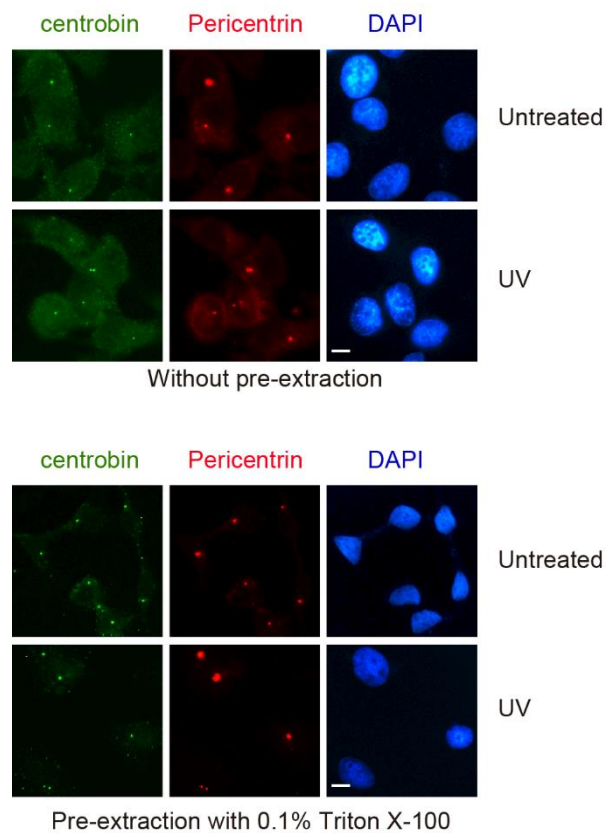

## Supplementary Figure S1

### Immunofluorescence of centrobilin (green) and pericentrin (red) in HeLa cells

HeLa cells were either left untreated or treated with UV ( $30 \text{ J/m}^2$ , 6 hr). Before methanol fixation, cells were either left untreated (upper panels) or pre-extracted with 0.1% Triton X-100 in PBS for 2 min to remove soluble nuclear proteins (lower panels). Representative images of HeLa cells stained for centrobilin (green), pericentrin (centrosome marker, red), and DNA (blue). Scale bars, 10  $\mu\text{m}$

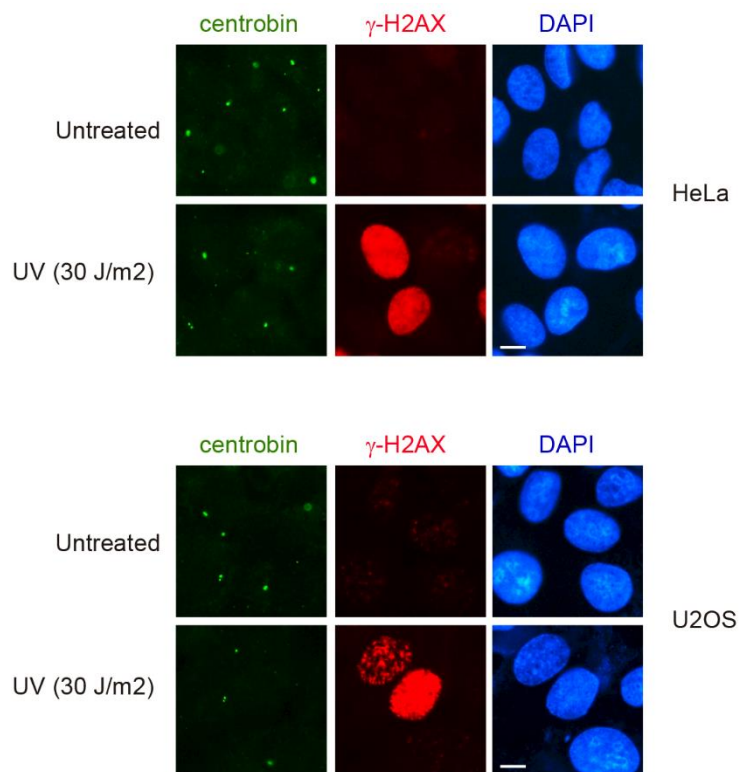

## Supplementary Figure S2

### Immunofluorescence of centrobilin (green) and $\gamma$ -H<sub>2</sub>AX (red) following UV radiation

HeLa cells and U2OS cells were either left untreated or treated with UV (30 J/m<sup>2</sup>, 6 hr). After pre-extraction and fixation, cells were stained with indicated antibodies. Representative images of HeLa (upper panels) and U2OS cells (lower panels) stained for centrobilin (green),  $\gamma$ -H<sub>2</sub>AX (red), and DNA (blue). Scale bars, 10  $\mu$ m.

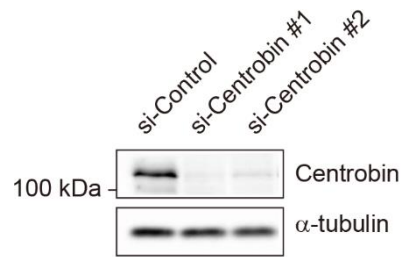

### Supplementary Figure S3

#### Depletion of centrobin in HeLa cells

HeLa cells were transfected with either control siRNA or centrobin-specific siRNAs. 72 hr after transfection, whole-cell lysates were prepared and immunoblotted using indicated antibodies.

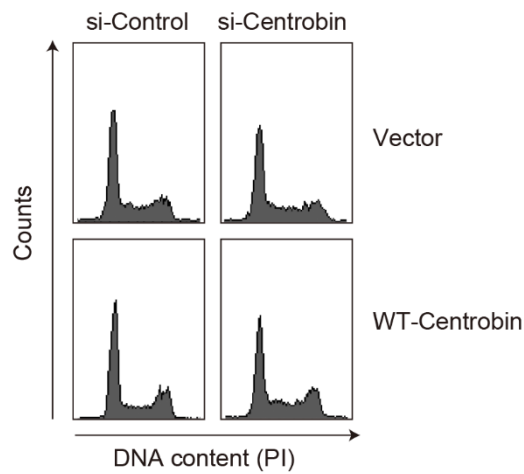

### Supplementary Figure S4

#### Cell-cycle distribution in centrobin-depleted DR-GFP U2OS cells

DR-GFP U2OS cells stably expressing either empty vector or siRNA-resistant centrobin were transfected with the indicated siRNAs. The cells were grown for 3 days after transfection and were processed for cell cycle analysis using propidium iodide (PI) DNA staining.
